# Supplementary material
Source: Springer Nature journal article supplement (https://www.springermedizin.de/resource/supplementary/12982_2006_46_MOESM1_ESM.pdf/9604364)

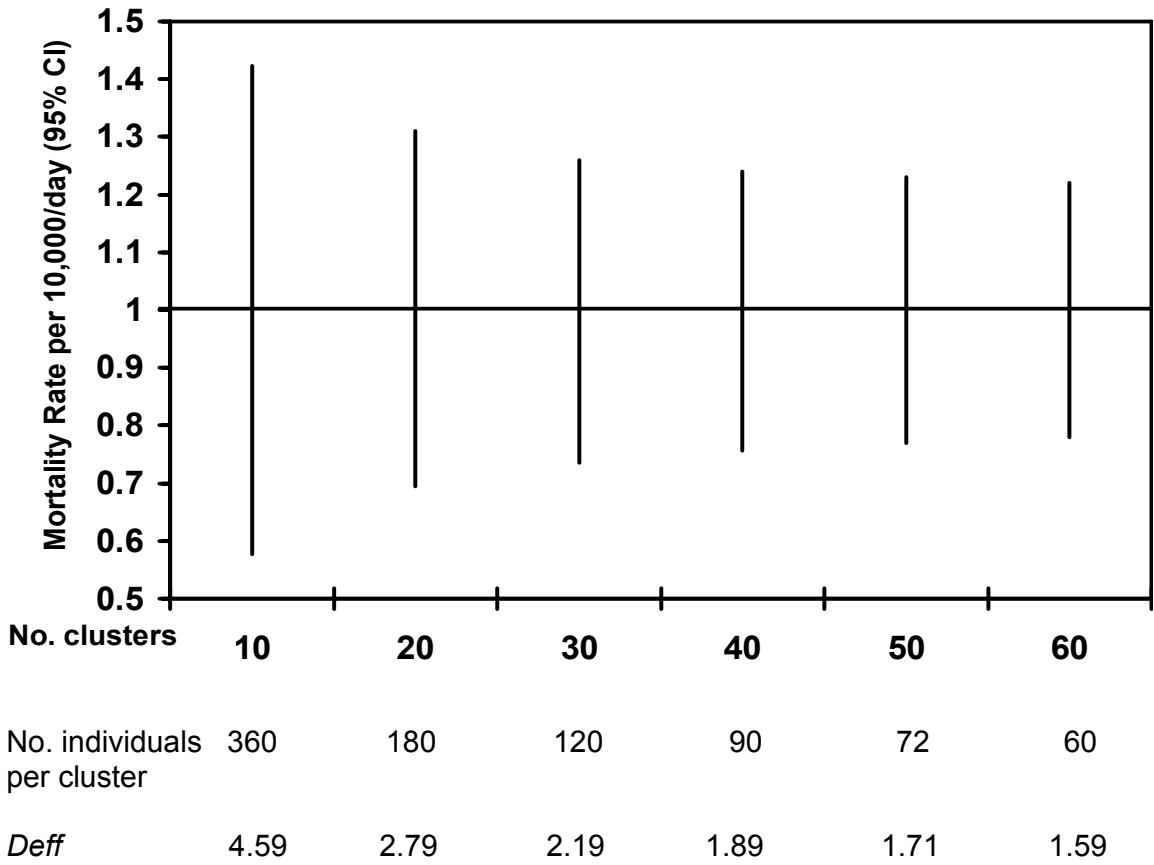

Supplement: MOESM1 [file 9604364]
